# Supplementary material
Source: PubMed Central journal article supplement (PMC2099472)
Supplement: 7601911s1.pdf [file 7601911s1.pdf]

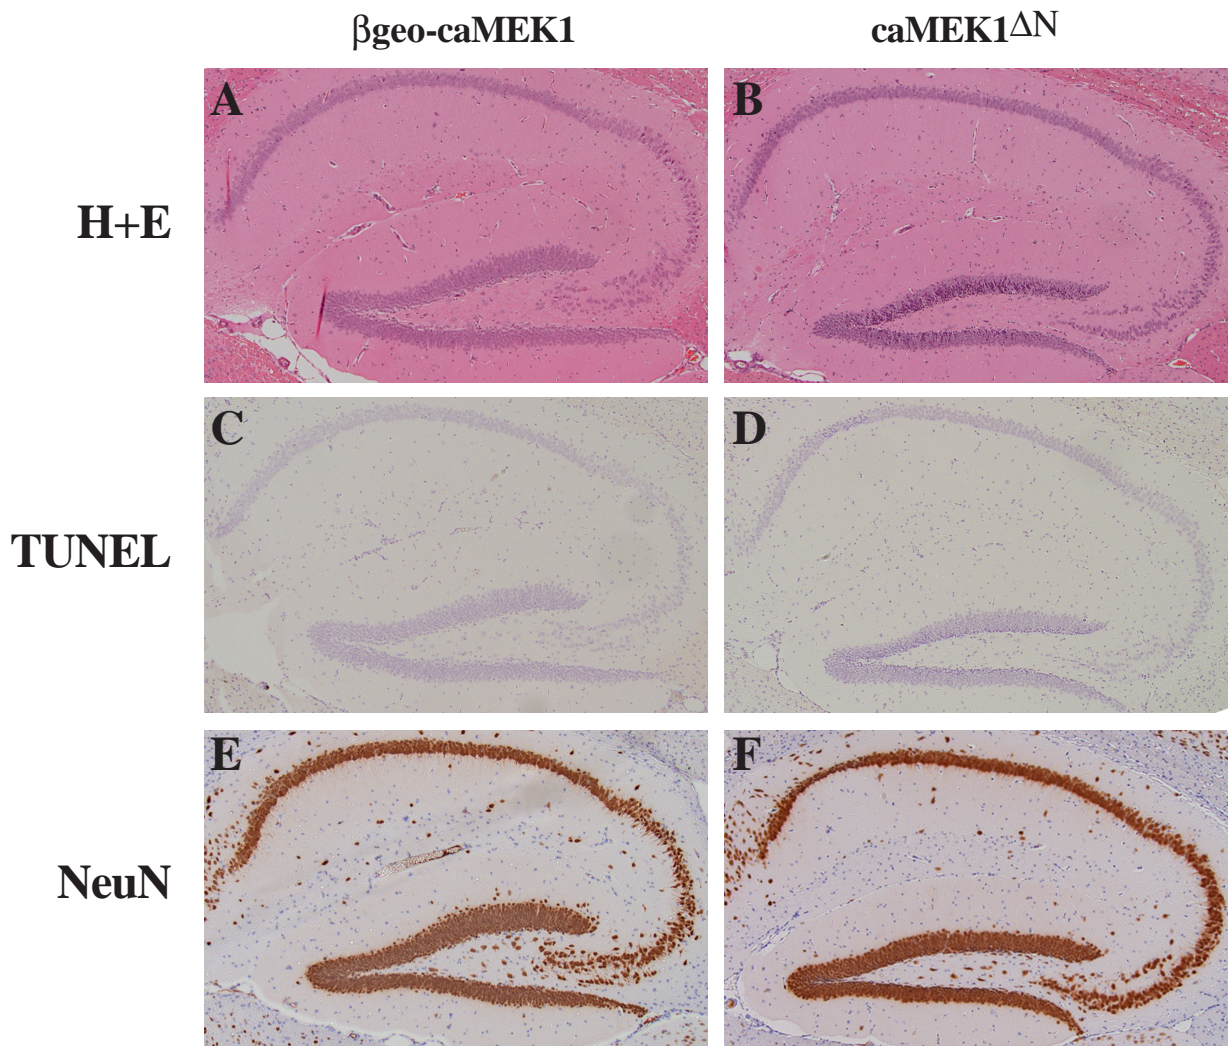

**Supplementary Figure 1**  
**Nateri et al.**

**A**

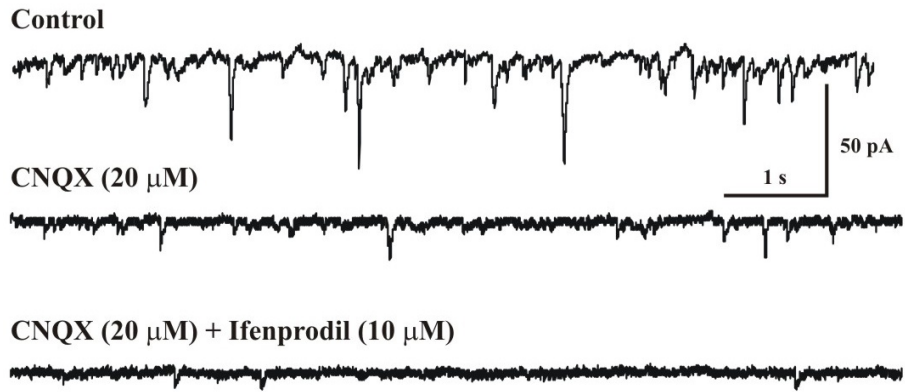

**B**

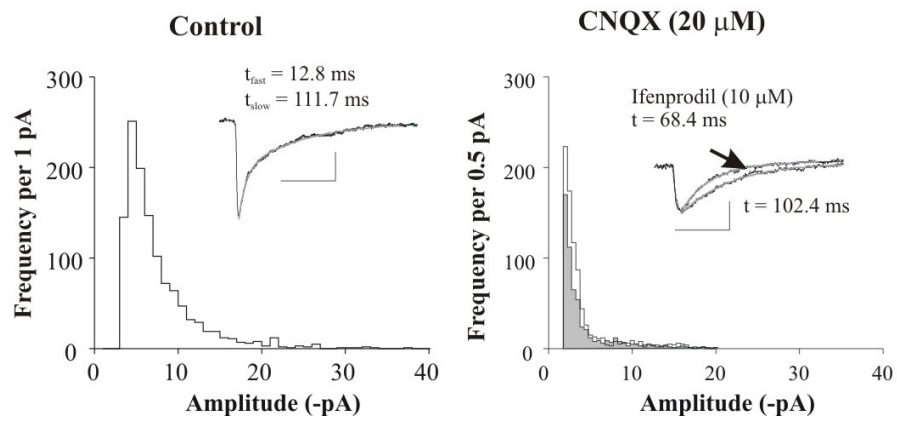

**Supplementary Figure 2**  
Nateri et al.

| Probe Set ID |             | Gene Title                                                                        | Gene Symbol   |
|--------------|-------------|-----------------------------------------------------------------------------------|---------------|
| 1416301_a_at | 14.41631246 | early B-cell factor 1                                                             | Ebf1          |
| 1416318_at   | 7.115670398 | serine (or cysteine) proteinase inhibitor, clade B, member 1a                     | Serpinb1a     |
| 1416326_at   | 6.750717438 | cysteine-rich protein 1 (intestinal)                                              | Crip1         |
| 1417040_a_at | 5.9316247   | Bcl-2-related ovarian killer protein                                              | Bok           |
| 1417525_at   | 5.678485857 | heart and neural crest derivatives expressed transcript 1                         | Hand1         |
| 1418620_at   | 4.954114866 | paired-like homeobox 2a                                                           | Phox2a        |
| 1418901_at   | 2.982159725 | CCAAT/enhancer binding protein (C/EBP), beta                                      | Cebpb         |
| 1419100_at   | 2.981709166 | serine (or cysteine) proteinase inhibitor, clade A, member 3N                     | Serpina3n     |
| 1419638_at   | 2.777355678 | ephrin B2                                                                         | Efnb2         |
| 1420546_at   | 2.75118524  | tyrosine hydroxylase                                                              | Th            |
| 1421373_at   | 2.680798567 | cytochrome c oxidase subunit IV isoform 2                                         | Cox4i2        |
| 1421375_a_at | 2.67359195  | S100 calcium binding protein A6 (calcyclin)                                       | S100a6        |
| 1421883_at   | 2.536329004 | ELAV (embryonic lethal, abnormal vision, Drosophila)-like 2 (Hu antigen B)        | Elavl2        |
| 1422040_at   | 2.421344329 | sema domain, immunoglobulin domain (Ig), and GPI membrane anchor, (semaphori      | Sema7a        |
| 1422301_at   | 2.376146576 | ferritin light chain 1                                                            | Ftl1          |
| 1422943_a_at | 2.35858234  | heat shock protein 1                                                              | Hspb1         |
| 1424882_a_at | 2.276856752 | RIKEN cDNA 2510015F01 gene                                                        | 2510015F01Rik |
| 1425229_a_at | 2.207102192 | transcription factor 7-like 2, T-cell specific, HMG-box                           | Tcf7l2        |
| 1425964_x_at | 1.998532149 | heat shock protein 1                                                              | Hspb1         |
| 1426044_a_at | 1.875913346 | protein kinase C, theta                                                           | Prkcq         |
| 1426988_at   | 1.851108892 | RIKEN cDNA C230080I20 gene                                                        | C230080I20Rik |
| 1430979_a_at | 0.667445236 | peroxiredoxin 2                                                                   | Prdx2         |
| 1434503_s_at | 0.664401252 | lysosomal membrane glycoprotein 2                                                 | Lamp2         |
| 1435194_at   | 0.610645798 | heat shock protein 4                                                              | Hspa4         |
| 1436936_s_at | 0.564786139 | Mus musculus 0 day neonate thymus cDNA, RIKEN full-length enriched library, clone | ---           |
| 1437502_x_at | 0.489056095 | CD24a antigen                                                                     | Cd24a         |
| 1437708_x_at | 0.447935093 | vesicle-associated membrane protein 3                                             | Vamp3         |
| 1444292_at   | 0.409784381 | NACHT, LRR and PYD containing protein 12                                          | Nalp12        |
| 1448169_at   | 0.399594478 | keratin complex 1, acidic, gene 18                                                | Krt1-18       |
| 1448873_at   | 0.379118057 | occludin                                                                          | Ocln          |
| 1449939_s_at | 0.343528362 | delta-like 1 homolog (Drosophila)                                                 | Dlk1          |
| 1451325_at   | 0.281881826 | RIKEN cDNA 3830421F13 gene                                                        | 3830421F13Rik |

1452731\_x\_at [0.174068316](#) RIKEN cDNA 2610042L04 gene

2610042L04Rik
